# Supplementary material for: Geochemical and microbial factors driving crustacean assemblages in adjacent groundwater bodies within the same aquifer
Source: Copernicus journal article supplement (doi:10.5194/egusphere-2023-2973), 2024-02-19
Supplement: Supplementary file 1 [file egusphere-2023-2973-supplement.pdf]

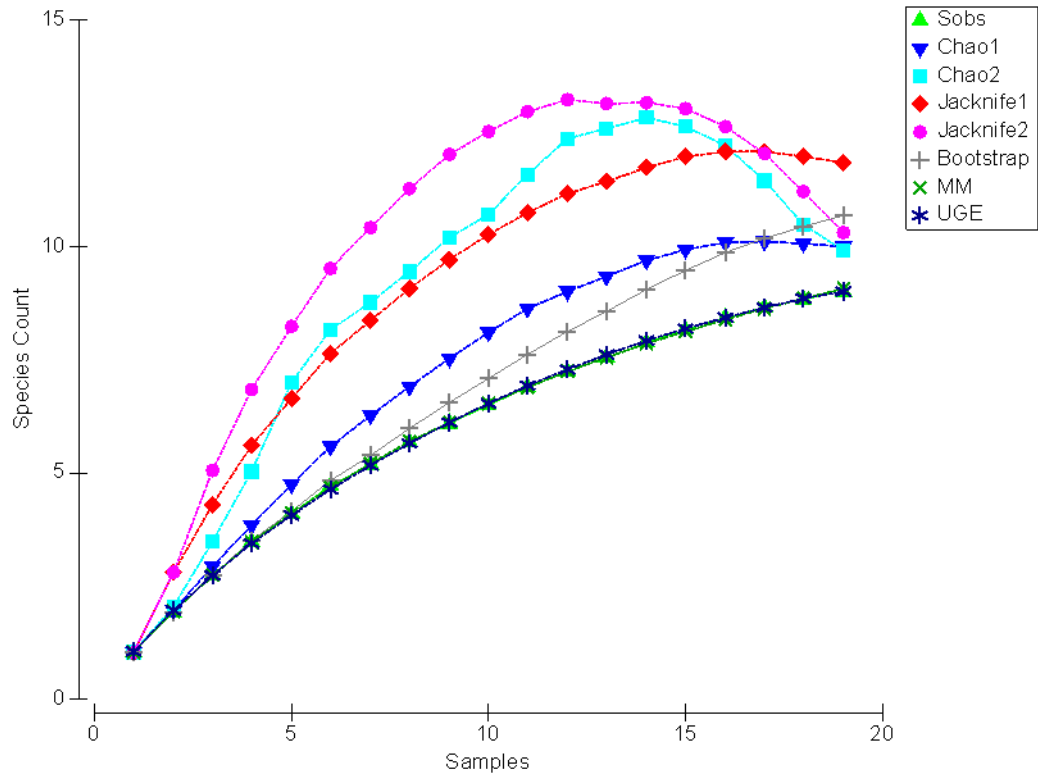

Fig. S1. Species rarefaction and estimators' curves of the crustacean taxa at increasing sample size. S(obs): species rarefaction curve of observed species richness. Other lines represent the estimated species richness using mean values obtained by the non-parametric and parametric estimators. Estimated species richness after 19 samples: Chao1: 10; Chao2: 9.9; Jackknife1: 11.8; Jackknife2: 10.3; Bootstrap: 10.6; MM: 9.1; UGE: 9.

Table S1. Results of the two-way PERMANOVAs for the environmental and microbial variables, and crustacean assemblage in the Sabatini Mounts aquifer; YEAR (2014 and 2015) and groundwater body (GWB): K-rich (K), earth-alkaline (E-A) and sulfate-depleted (S-D). Permutational post-hoc *t*-tests were performed for significant PERMANOVA outcomes not biased by heterogeneity of variances. \* indicates significant PERMDISP. Degree of freedom are indicated in brackets. SB indicates groundwater-obligate species. Significant p-values < 0.05 are reported in bold.

| Variable                         | GWB (2,14)    | YEAR (1,14)   | GWBxYEAR (2,14) | K/E-A(10)    | K/S-D(10)    | S-D/E-A(8)   |
|----------------------------------|---------------|---------------|-----------------|--------------|--------------|--------------|
| <b>Overall field data</b>        | <b>0.002</b>  | 0.435         | 0.984           | <b>0.043</b> | <b>0.001</b> | <b>0.004</b> |
| WT                               | 0.474         | 0.972         | 1.000           |              |              |              |
| ORP                              | 0.179         | 0.263         | 0.814           |              |              |              |
| T                                | <b>0.023</b>  | 0.076         | 0.921           | 0.348        | 0.096        | <b>0.006</b> |
| pH                               | <b>0.002</b>  | 0.502         | 0.553           | <b>0.005</b> | 0.104        | <b>0.011</b> |
| DO                               | 0.436         | 0.798         | 0.806           |              |              |              |
| EC                               | <b>0.001</b>  | 0.902         | 0.994           | <b>0.001</b> | <b>0.001</b> | <b>0.038</b> |
| <b>Major</b>                     | <b>0.001</b>  | <b>0.019</b>  | 0.095           | <b>0.001</b> | <b>0.001</b> | <b>0.001</b> |
| F                                | <b>0.011*</b> | 0.964         | 0.992           |              |              |              |
| Cl                               | 0.524         | 0.803         | 0.992           |              |              |              |
| NO <sub>3</sub>                  | <b>0.012*</b> | 0.702         | 0.947           |              |              |              |
| SO <sub>4</sub>                  | <b>0.025</b>  | 0.984         | 0.997           | 0.281        | <b>0.003</b> | <b>0.019</b> |
| HCO <sub>3</sub>                 | <b>0.001</b>  | 0.931         | 0.997           | <b>0.006</b> | <b>0.002</b> | <b>0.001</b> |
| Na                               | <b>0.002</b>  | 0.296         | 0.817           | 0.071        | <b>0.004</b> | 0.066        |
| Mg                               | 0.113         | 0.759         | 0.892           |              |              |              |
| K                                | <b>0.001</b>  | 0.075         | 0.807           | <b>0.007</b> | <b>0.002</b> | 0.178        |
| Ca                               | <b>0.005*</b> | 0.835         | 0.926           |              |              |              |
| Si                               | <b>0.021</b>  | <b>0.001</b>  | 0.638           | 0.092        | <b>0.036</b> | 0.954        |
| DOC                              | 0.813         | <b>0.019</b>  | 0.401           |              |              |              |
| <b>Trace</b>                     | <b>0.003</b>  | 0.535         | 0.986           | 0.101        | <b>0.013</b> | <b>0.021</b> |
| Li                               | <b>0.008</b>  | 0.921         | 0.989           | <b>0.019</b> | <b>0.016</b> | 0.1          |
| B                                | <b>0.001</b>  | 0.117         | 0.956           | <b>0.035</b> | <b>0.001</b> | <b>0.01</b>  |
| Al                               | 0.751         | 0.134         | 0.785           |              |              |              |
| V                                | 0.53          | 0.085         | 0.62            |              |              |              |
| Cr                               | 0.423         | 0.603         | 0.97            |              |              |              |
| Mn                               | 0.64          | 0.505         | 0.265           |              |              |              |
| Fe                               | 0.739         | 0.392         | 0.439           |              |              |              |
| Ni                               | 0.309         | 0.245         | 0.355           |              |              |              |
| Cu                               | 0.317*        | 0.203         | 0.867           |              |              |              |
| Zn                               | 0.156         | 0.473         | 0.845           |              |              |              |
| As                               | 0.591         | 0.552         | 0.929           |              |              |              |
| Se                               | <b>0.036*</b> | 0.466         | 0.778           |              |              |              |
| Rb                               | <b>0.001</b>  | 0.476         | 0.957           | <b>0.048</b> | <b>0.01</b>  | <b>0.02</b>  |
| Sr                               | 0.192*        | 0.948         | 0.943           |              |              |              |
| Ba                               | 0.339         | 0.489         | 0.459           |              |              |              |
| Pb                               | 0.866         | 0.635         | 0.358           |              |              |              |
| U                                | <b>0.003</b>  | 0.965         | 0.959           | 0.089        | <b>0.002</b> | <b>0.004</b> |
| <b>Microbial</b>                 |               |               |                 |              |              |              |
| TCC                              | <b>0.038</b>  | 0.345         | 0.72            | 0.781        | <b>0.046</b> | <b>0.005</b> |
| LNA                              | <b>0.034</b>  | 0.695         | 0.836           | 0.38         | <b>0.038</b> | <b>0.006</b> |
| HNA                              | <b>0.032</b>  | 0.825         | 0.905           | 0.365        | <b>0.037</b> | <b>0.014</b> |
| HNA/LNA                          | <b>0.036</b>  | 0.772         | 0.905           | 0.386        | <b>0.048</b> | <b>0.016</b> |
| <b>Overall substrates</b>        | <b>0.001*</b> | <b>0.003*</b> | <b>0.011</b>    |              |              |              |
| Carbohydrates                    | <b>0.028</b>  | <b>0.003</b>  | <b>0.001</b>    |              |              |              |
| Polymers                         | <b>0.001*</b> | <b>0.004</b>  | <b>0.032</b>    |              |              |              |
| Carboxylic acids                 | 0.052         | <b>0.006*</b> | <b>0.024</b>    |              |              |              |
| Aminoacids                       | <b>0.021*</b> | <b>0.002</b>  | <b>0.06</b>     |              |              |              |
| Amines                           | 0.127         | 0.134         | 0.338           |              |              |              |
| <b>Crustaceans</b>               |               |               |                 |              |              |              |
| All species                      | <b>0.015*</b> | 0.754         | 0.869           |              |              |              |
| SB                               | <b>0.002</b>  | 0.615         | 0.382           | 0.83         | <b>0.002</b> | <b>0.003</b> |
| <i>Overall locomotion</i>        | <b>0.001</b>  | 0.169         | 0.646           | 0.857        | <b>0.001</b> | <b>0.001</b> |
| burrower                         | <b>0.001</b>  | 0.434         | 0.575           | 0.667        | <b>0.001</b> | <b>0.001</b> |
| interstitial                     | 0.737         | 0.45          | 0.724           |              |              |              |
| swimmer                          | 0.422         | 0.216         | 0.472           |              |              |              |
| <i>Overall diet</i>              | <b>0.006*</b> | 0.457         | 0.919           |              |              |              |
| fine sediment + microorg.        | <b>0.007*</b> | 0.288         | 0.728           |              |              |              |
| living microphytes               | 0.152         | 0.999         | 0.999           |              |              |              |
| <i>Overall feeding habits</i>    | 0.111         | 0.55          | 0.841           |              |              |              |
| deposit-feeder                   | 0.078         | 0.423         | 0.575           |              |              |              |
| collector                        | 0.217         | 0.407         | 0.513           |              |              |              |
| grazer                           | 0.153         | 0.998         | 0.997           |              |              |              |
| <i>Overall thermal tolerance</i> | <b>0.006</b>  | 0.161         | 0.915           | 0.844        | <b>0.004</b> | <b>0.014</b> |
| eurythermal                      | <b>0.003</b>  | 0.217         | 0.822           | 0.952        | <b>0.007</b> | <b>0.013</b> |
| moderately stenothermal          | 0.443         | 0.204         | 0.451           |              |              |              |
| stenothermal                     | 0.331         | 0.259         | 0.597           |              |              |              |

Table S2. Results of DistLM (Distance-based Linear Model) tests examining linear relationships between environmental and microbial factors, and crustacean assemblage characteristics. DistLM tests were conducted to assess the associations between a range of environmental and microbial predictor variables and three response variables: overall crustacean assemblage composition, abundances of groundwater-obligate species, and the composition of the assemblage in terms of functional traits.

Conditional DistLM tests report AICc (Akaike Information Criterion corrected for small sample sizes) and R<sup>2</sup> (explained variance) values. Abbreviations as in Table S2.

| <b>Var 1</b>                    | <b>Var 2</b>      | <b>AICc</b> | <b>R2</b> | <b>N. var</b> | <b>Var</b>                   |
|---------------------------------|-------------------|-------------|-----------|---------------|------------------------------|
| Taxonomic composition           | Field parameters  | 141.08      | 0.32      | 1             | EC                           |
| Taxonomic composition           | Major ions        | 136.66      | 0.52      | 2             | SO4; Ca                      |
| Taxonomic composition           | Trace elements    | 137.43      | 0.71      | 5             | V, Cr, tot, As, Se, U        |
| Taxonomic composition           | Microbial factors | 139.07      | 0.36      | 1             | HNA                          |
| Groundwater-obligate abundances | Field parameters  | 127.4       | 0.49      | 2             | EC, pH                       |
| Groundwater-obligate abundances | Major ions        | 99.38       | 0.91      | 4             | NO3, SO4, K, Ca              |
| Groundwater-obligate abundances | Trace elements    | 11.54       | 0.89      | 5             | B, Al, V, Se, Ba             |
| Groundwater-obligate abundances | Microbial factors | 130.42      | 0.71      | 3             | CARB, LNA                    |
| Locomotion                      | Field parameters  | 100.54      | 0.11      | 1             | ORP                          |
| Locomotion                      | Major ions        | 101.4       | 0.07      | 1             | DOC                          |
| Locomotion                      | Trace elements    | 100.77      | 0.1       | 1             | Rb                           |
| Locomotion                      | Microbial factors | 100.01      | 0.25      | 2             | CARB_A, AMIN                 |
| Diet                            | Field parameters  | 117.84      | 0.36      | 2             | pH, EC                       |
| Diet                            | Major ions        | 110.67      | 0.62      | 3             | SO4, K, Ca                   |
| Diet                            | Trace elements    | 109.42      | 0.81      | 6             | Li, B, Cr tot, Ni, As tot, U |
| Diet                            | Microbial factors | 120.34      | 0.28      | 2             | CARB, AMMI                   |
| Feeding habits                  | Field parameters  | 119.58      | 0.33      | 2             | pH, EC                       |
| Feeding habits                  | Major ions        | 113.66      | 0.58      | 3             | SO4, K, Ca                   |
| Feeding habits                  | Trace elements    | 113.6       | 0.77      | 6             | Li, B, Cr tot, Ni, As tot, U |
| Feeding habits                  | Microbial factors | 115.52      | 0.19      | 1             | CARB                         |
| Thermal tolerance               | Field parameters  | 111.46      | 0.43      | 2             | pH, EC                       |
| Thermal tolerance               | Major ions        | 113.28      | 0.38      | 2             | HCO3, Na                     |
| Thermal tolerance               | Trace elements    | 110.07      | 0.62      | 2             | Li, B, As tot, Rb            |
| Thermal tolerance               | Microbial factors | 115.62      | 0.19      | 1             | POLY                         |
